# Supplementary material for: Effect of sleep deprivation on emotional working memory
Source: PubMed Central journal article supplement — J Sleep Res. 2018 Aug 8;28(1):e12744. doi: 10.1111/jsr.12744 (PMC7379257; doi:10.1111/jsr.12744), 2018-08-08
Supplement: JSR-28-e12744-s001.pdf [file JSR-28-e12744-s001.pdf]

Gerhardsson, A., Åkerstedt, T., Axelsson, J., Fischer, H., Lekander, M., Schwarz, J. Effect of sleep deprivation on emotional working memory. *Journal of Sleep Research*, 2018, e12744. DOI: 10.1111/jsr.12744

**Table S1.** IAPS normative valence and arousal scores in the sample.

|           | Negative    | Positive    | Neutral     |
|-----------|-------------|-------------|-------------|
| N         | 24          | 24          | 48          |
| Valence   |             |             |             |
| Mean (SD) | 2.62 (0.26) | 7.74 (0.30) | 5.17 (0.46) |
| Range     | 2.06–2.99   | 7.25–8.28   | 4.13–5.97   |
| Arousal   |             |             |             |
| Mean (SD) | 4.93 (0.57) | 4.63 (0.64) | 3.84 (0.82) |
| Range     | 4.00–6.61   | 3.73–6.28   | 2.51–5.51   |

Note: IAPS: International Affective Picture System. Picture reference number. Negative: 2301, 2750, 2751, 2799, 6300, 9000, 9180, 9181, 9220, 9280, 9291, 9295, 9320, 9342, 9415, 9430, 9435, 9560, 9561, 9830, 9832, 9922, 9925, 9927. Positive: 1440, 1441, 1460, 1463, 1721, 1750, 1811, 1920, 1999, 2091, 2154, 2314, 2345, 2530, 5202, 5210, 5480, 5780, 5829, 5830, 5831, 7502, 7580, 8190. Neutral: 1121, 1350, 1505, 1560, 1616, 1908, 2191, 2597, 5130, 5395, 5535, 5731, 5740, 5900, 7002, 7012, 7016, 7025, 7032, 7035, 7041, 7045, 7061, 7081, 7096, 7100, 7130, 7137, 7161, 7186, 7188, 7205, 7211, 7224, 7236, 7248, 7496, 7497, 7504, 7512, 7513, 7547, 7560, 7600, 7820, 7830, 8325, 9913

**Table S2.** Mixed effects models for reaction time.

| <i>Model including fixed factors:<br/>sleep × load × valence (tested against)</i>                       | <i>df</i> | <i>AIC</i>      | <i>BIC</i>      | <i>LL</i>      | <i>χ<sup>2</sup></i> | <i>df<sub>χ<sup>2</sup></sub></i> | <i>p</i>        |
|---------------------------------------------------------------------------------------------------------|-----------|-----------------|-----------------|----------------|----------------------|-----------------------------------|-----------------|
| 1. Random intercept: subject                                                                            | 14        | -661.223        | -572.517        | 344.612        |                      |                                   |                 |
| 2. Random: subject and picture (1)                                                                      | 15        | -671.688        | -576.646        | 350.844        | 12.465               | 1                                 | .001            |
| <b>3. Random: subject and picture, slope for load within subject (2)</b>                                | <b>17</b> | <b>-756.273</b> | <b>-648.558</b> | <b>395.136</b> | <b>88.585</b>        | <b>2</b>                          | <b>&lt;.001</b> |
| 4. Random: subject and picture, slope for valence within subject (2)                                    | 20        | -668.447        | -541.724        | 354.223        | 6.759                | 5                                 | 0.239           |
| 5a. Random: subject and picture, slope for load within subject and slope for valence within subject (3) | 23        | -751.817        | -606.086        | 398.909        | 7.544                | 6                                 | 0.273           |
| 5b. Random: subject and picture, slope for load within subject and slope for valence within subject (4) | 23        | -751.817        | -606.086        | 398.909        | 89.37                | 3                                 | <.001           |

Note: AIC: Akaike's Information Criterion, BIC: Bayesian Information Criterion, LL: Log-Likelihood. Model 3 (bold) best fit. Covariance between the random intercept and random slope was included.

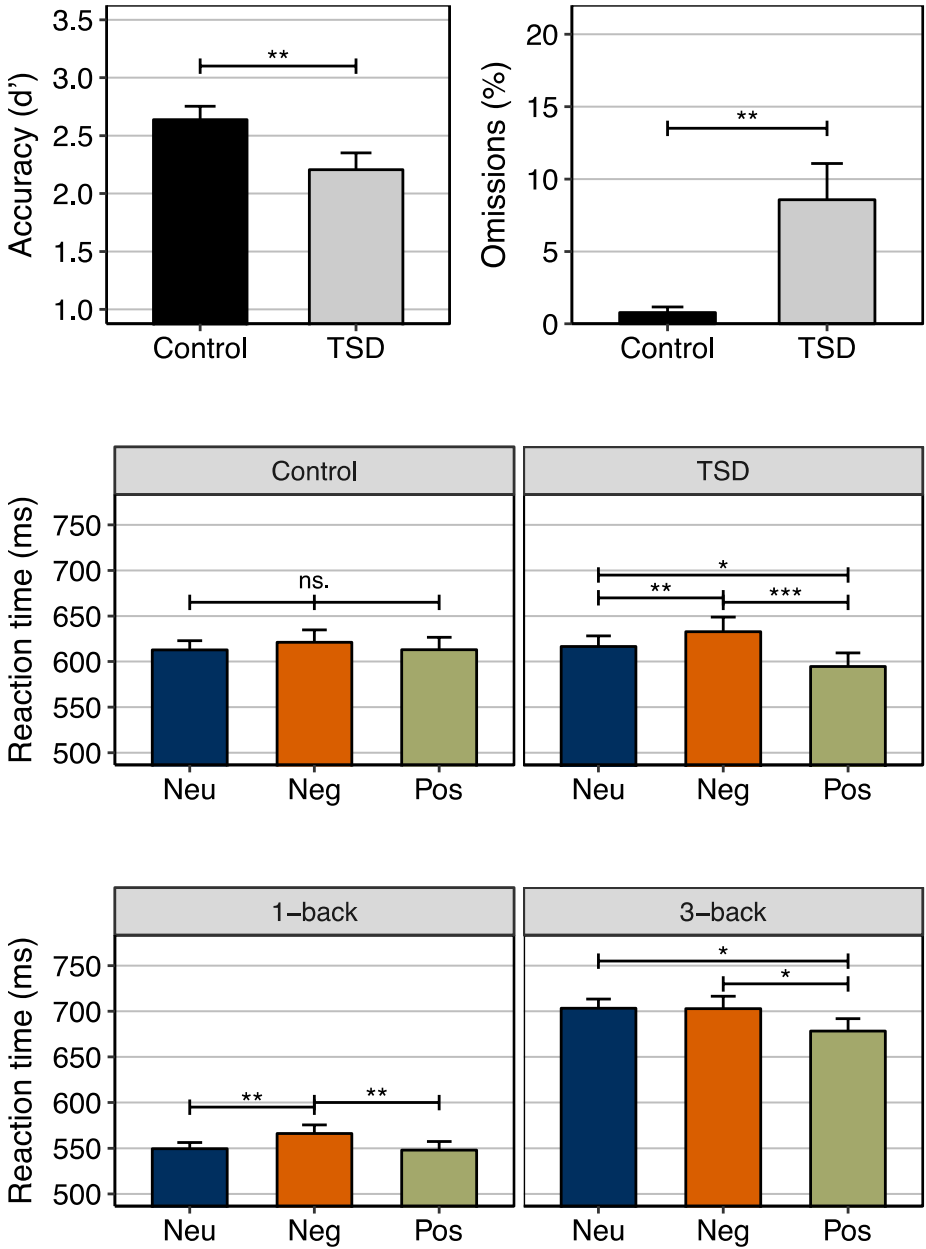

**Figure S1.** Performance on emotional N-back task. Panels display (A) accuracy, (B) omission percent, and reaction time for (C) each Control and sleep deprivation (TSD) and (D) 1-back and 3-back condition, on neutral (Neu), negative (Neg) and positive (Pos) pictures. \* $p < .05$ , \*\* $p < .01$ , \*\*\* $p < .001$ ; error bars represent 95% CI.

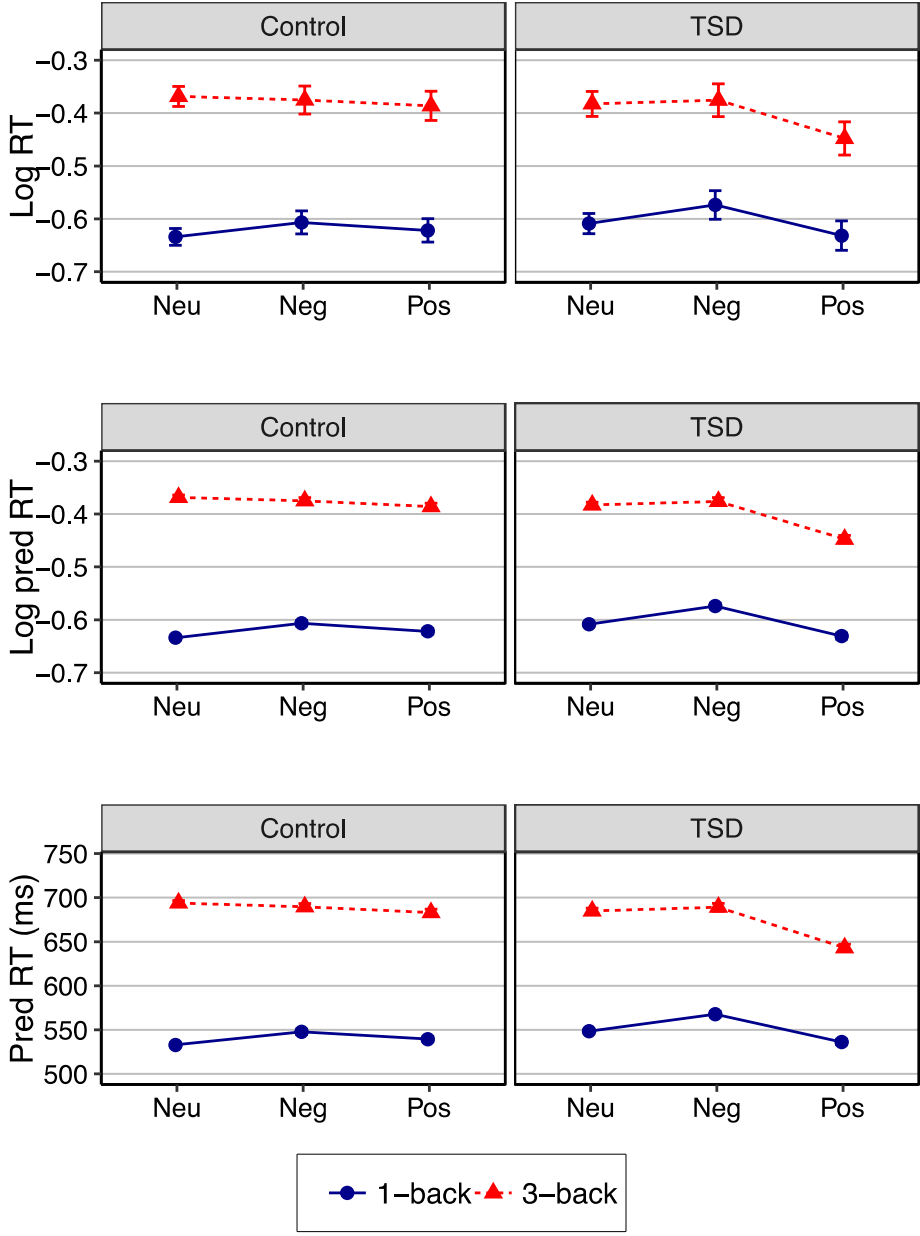

**Figure S2.** Reaction time on emotional N-back task. Panels display (A) Logged reaction times, (B) logged and predicted from model, and (C) predicted from model reaction times for control and sleep deprivation (TSD) and 1-back (blue) and 3-back (red) condition, on negative (Neg), neutral (Neu) and positive (Pos) pictures. Error bars represent 95% CI.
